# Supplementary material for: Exploration of Primary Care Clinician Attitudes and Cognitive Characteristics Associated With Prescribing Antibiotics for Asymptomatic Bacteriuria
Source: PubMed Central journal article supplement (PMC9142875; doi:10.1001/jamanetworkopen.2022.14268), 2022-05-27
Supplement: jamanetwopen-e2214268-s001.pdf [file jamanetwopen-e2214268-s001.pdf]

## Supplementary Online Content

Baghdadi JD, Korenstein D, Pineles L, et al. Exploration of primary care clinician attitudes and cognitive characteristics associated with prescribing antibiotics for asymptomatic bacteriuria. *JAMA Netw Open*. 2022;5(5):e2214268. doi:10.1001/jamanetworkopen.2022.14268

### **eAppendix.** Scales Included in Survey

This supplementary material has been provided by the authors to give readers additional information about their work.

## eAppendix. Scales Included in Survey

### THE REVISED PHYSICIANS' REACTIONS TO UNCERTAINTY SCALES

Gerrity MS, White KP, DeVellis RF, Dittus. *Physicians' reactions to uncertainty: refining the constructs and scales. Motivation and Emotion* 1995;19:175-191.

#### Stress from Uncertainty Subscale

Final score is sum of scores for participants who answered all 3 questions (possible range 3-18). Higher score indicates higher stress from uncertainty.

Items are rated on a 6-point Likert scale: 1 = strongly disagree, 2 = moderately disagree, 3= slightly disagree, 4 = slightly agree, 5 = moderately agree, 6 = strongly agree.

| 4 items (adapted version)                                      |
|----------------------------------------------------------------|
| There is often uncertainty in the practice of medicine         |
| I find the uncertainty involved in patient care disconcerting. |
| Uncertainty in patient care makes me uneasy.                   |
| The uncertainty of patient care often troubles me.             |

#### Concern About Bad Outcomes Subscale

Final score is sum of scores for participants who answered all 3 questions (possible range 3-18). Higher score indicates higher concern about bad outcomes.

Items are rated on a 6-point Likert scale: 1 = strongly disagree, 2 = moderately disagree, 3 = slightly disagree, 4 = slightly agree, 5 = moderately agree, 6 = strongly agree.

| 3 items                                                                                                       |
|---------------------------------------------------------------------------------------------------------------|
| When I am uncertain of a diagnosis, I imagine all sorts of bad scenarios - patient dies, patient sues, etc... |
| I fear being held accountable for the limits of my knowledge.                                                 |
| I worry about malpractice when I do not know a patient's diagnosis.                                           |

### FEAR OF MALPRACTICE

Katz D, Williams G, Brown R, et al. *Emergency Physicians' Fear of Malpractice in Evaluating Patients With Possible Acute Cardiac Ischemia*

Final score is sum of responses for participants who answered all 6 questions (possible range 6-30). Higher scores indicate higher fear of malpractice.

Items are rated on a 5-point Likert scale: 1 = disagree strongly, 2 = disagree, 3= neutral, 4 = agree, 5 = agree strongly.

| 6 Items                                                                                                                            |
|------------------------------------------------------------------------------------------------------------------------------------|
| 1. I have had to make significant changes in my practice pattern because of recent legal developments concerning medical delivery. |
| 2. I am concerned that I will be involved in a malpractice case sometime in the next 10 years.                                     |
| 3. I feel pressured in my day-to-day practice by the threat of malpractice litigation.                                             |
| 4. I order some tests or consultations simply to avoid the appearance of malpractice.                                              |
| 5. Sometimes I ask for consultant opinions primarily to reduce my risk of being sued.                                              |
| 6. Relying on clinical judgment rather than on technology to make a diagnosis is becoming riskier from a medicolegal perspective.  |

### MEDICAL MAXIMIZER-MINIMIZER SCALE (MODIFIED VERSION)

Scherer LD, Caverly TJ, Burke J, Zikmund-Fisher BJ, Kullgren JT, Steinley D, McCarthy DM, Roney M, Fagerlin A. Development of the Medical Maximizer-Minimizer Scale. *Health Psychol.* 2016 Nov;35(11):1276-1287.

Final score is the mean of all items for participants who answered all 7 questions.

Higher scores indicate more maximizing preferences.

Items are rated on a 7-point Likert scale: 1 = disagree strongly, 7=agree strongly

| 8 items (adapted version)                                                                                                                  |
|--------------------------------------------------------------------------------------------------------------------------------------------|
| 1. It is important to treat disease even when it does not make a difference in survival                                                    |
| 2. It is important to treat a disease even when it does not make a difference in quality of life                                           |
| 3. Doing everything to fight illness is always the right choice                                                                            |
| 4. When it comes to health care, the only responsible thing to do is to actively seek medical care                                         |
| 5. If I have a health issue, my preference is to wait and see if the problem gets better on its own before <i>doing anything about it*</i> |
| 6. When it comes to health care, watching and waiting is never an acceptable option                                                        |
| 7. When it comes to medical treatment, more is usually better                                                                              |
| 8. Diagnostic tests always provide helpful information even if their results do not directly impact care                                   |

\* Item is reverse scored

### RISK TAKING SCALE

Pearson SD, Goldman L, Orav EJ, et al. Triage decisions for emergency department patients with chest pain: do physicians' risk attitudes make the difference? *J Gen Intern Med.* 1995;10(10):557-564.

Final risk taking score = sum of responses x (6-[6 - number of missing responses]).

Higher score indicates “risk seeking” and lower score indicates “risk aversion”.

Items are rated on a 6-point Likert scale: 1 = strongly disagree, 2 = moderately disagree, 3= slightly disagree, 4 = slightly agree, 5 = moderately agree, 6 = strongly agree

| <b>6 items</b>                                                           |
|--------------------------------------------------------------------------|
| 1. I enjoy taking risks.                                                 |
| 2. I try to avoid situations that have uncertain outcomes.*              |
| 3. Taking risks does not bother me if the gains involved are high.       |
| 4. I consider security an important element in every aspect of my life.* |
| 5. People have told me that I seem to enjoy taking chances.              |
| 6. I rarely, if ever, take risks when there is another alternative.*     |

\* Item is reverse scored

## NUMERACY

*Schwartz LM, Woloshin S, Black WC, Welch HG. The role of numeracy in understanding the benefit of screening mammography. Ann Intern Med. 1997;127 (11):966-972.*

A reliable, validated instrument frequently used in numeracy studies. Scored as the total number of correct responses (range 0-3).

| <b>3 items</b>                                                                                                                                                                                       |
|------------------------------------------------------------------------------------------------------------------------------------------------------------------------------------------------------|
| 1. Imagine that we flip a fair coin 1,000 times. What is your best guess as to how many times the coin would come up heads in 1,000 flips?                                                           |
| 2. In the BIGS BUCKS LOTTERY, the chance of winning a \$10 is 1%. What is your best guess as to how many people would win a \$10 prize if 1000 people each buy a single ticket to BIG BUCKS LOTTERY? |
| 3. In ACME PUBLISHING SWEEPSTAKES, the chance of winning a car is 1 in 1,000. What percent of tickets to ACME PUBLISHING SWEEPSTAKES win a car?                                                      |
